# Supplementary material
Source: PubMed Central journal article supplement (PMC3580236)
Supplement: NIHMS430745-supplement-1_si_001.pdf [file NIHMS430745-supplement-1_si_001.pdf]

**Figure S1. Comparison of the yeast Rev1 BRCT domain to other BRCT domains.** The structure of the yeast Rev1 BRCT domain (green) is shown aligned with twelve other single-copy BRCT domains (purple). These other BRCT domains include the human Rev1 BRCT domain (unpublished structure), the topoisomerase II $\beta$  binding protein 1 (TopBP1) BRCT domain (1), the human X-ray repair cross-complementing protein 1 (XRCC1) BRCT domain (unpublished structure), the human microcephalin (MCPH1) BRCT domain (2), the poly [ADP-ribose] polymerase 1 (PARP-1) BRCT domain (3), the human DNA ligase IV BRCT domain (unpublished structure), the replication factor C subunit 1 (RFC1) BRCT domain (unpublished structure), the yeast Dbf4 BRCT domain (unpublished structure), the human DNA polymerase  $\mu$  (Pol  $\mu$ ) BRCT domain (4), human DNA polymerase  $\lambda$  (Pol  $\lambda$ ) BRCT domain (unpublished structure), the human terminal deoxynucleotidyltransferase (TdT) BRCT domain (unpublished structure), and the yeast Rap1 BRCT domain (5). The PDB ID codes, the percent sequence identity, the RMSD, and the number of C $\alpha$  atoms used in the RMSD calculation are provided for each structural alignment.

## References

1. Leung CCY, Kellogg E, Kuhnert A, Haenel F, Baker D, Glover JNM. Insights from the crystal structure of the sixth BRCT domain of topoisomerase II beta binding protein 1. *Protein Science*. 2010;19(1):162-7.
2. Richards MW, Leung JWC, Roe SM, Li K, Chen J, Bayliss R. A Pocket on the Surface of the N-Terminal BRCT Domain of Mchp1 Is Required to Prevent Abnormal Chromosome Condensation. *Journal of Molecular Biology*. 2010;395(5):908-15.
3. Loeffler PA, Cuneo MJ, Mueller GA, DeRose EF, Gabel SA, London RE. Structural studies of the PARP-1 BRCT domain. *Bmc Structural Biology*. 2011;11.
4. DeRose EF, Clarkson MW, Gilmore SA, Galban CJ, Tripathy A, Havener JM, et al. Solution structure of polymerase mu's BRCT domain reveals an element essential for its role in nonhomologous end joining. *Biochemistry*. 2007;46(43):12100-10.
5. Zhang W, Zhang J, Zhang X, Xu C, Tu X. Solution structure of Rap1 BRCT domain from *Saccharomyces cerevisiae* reveals a novel fold. *Biochemical and Biophysical Research Communications*. 2011;404(4):1055-9.

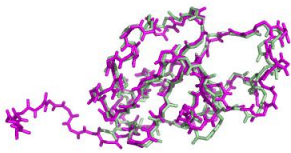

**Human Rev1 BRCT domain**  
 PDB ID: 2EBW  
 Sequence identity: 44 %  
 RMSD: 1.0 Å  
 C $\alpha$  atoms aligned: 86

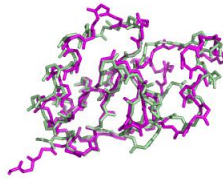

**TopBP1 BRCT domain**  
 PDB ID: 3JVE  
 Sequence identity: 21 %  
 RMSD: 1.6 Å  
 C $\alpha$  atoms aligned: 82

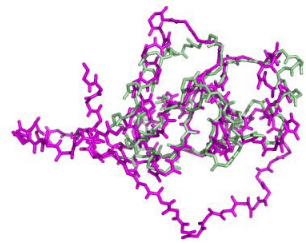

**XRCC1 BRCT domain**  
 PDB ID: 2D8M  
 Sequence identity: 23 %  
 RMSD: 1.7 Å  
 C $\alpha$  atoms aligned: 82

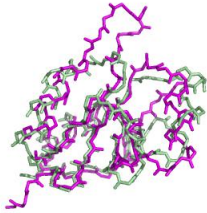

**MCPH1 BRCT domain**  
 PDB ID: 2WT8  
 Sequence identity: 17 %  
 RMSD: 1.9 Å  
 C $\alpha$  atoms aligned: 81

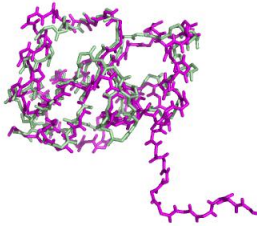

**PARP-1 BRCT domain**  
 PDB ID: 2LEO  
 Sequence identity: 25 %  
 RMSD: 2.1 Å  
 C $\alpha$  atoms aligned: 84

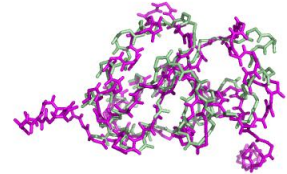

**DNA Ligase IV BRCT domain**  
 PDB ID: 2E2W  
 Sequence identity: 19 %  
 RMSD: 2.2 Å  
 C $\alpha$  atoms aligned: 84

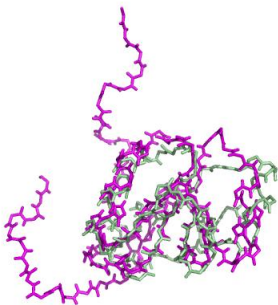

**RFC1 BRCT domain**  
 PDB ID: 2EBU  
 Sequence identity: 17 %  
 RMSD: 2.6 Å  
 C $\alpha$  atoms aligned: 75

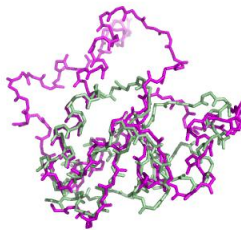

**DBF4 BRCT domain**  
 PDB ID: 3OQ4  
 Sequence identity: 16 %  
 RMSD: 2.7 Å  
 C $\alpha$  atoms aligned: 73

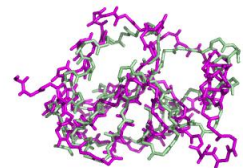

**Pol  $\mu$  BRCT domain**  
 PDB ID: 2HTF  
 Sequence identity: 18 %  
 RMSD: 2.7 Å  
 C $\alpha$  atoms aligned: 82

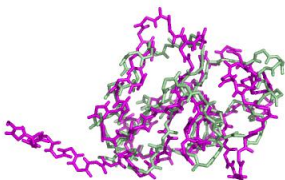

**Pol  $\lambda$  BRCT domain**  
 PDB ID: 2JW5  
 Sequence identity: 22 %  
 RMSD: 2.8 Å  
 C $\alpha$  atoms aligned: 82

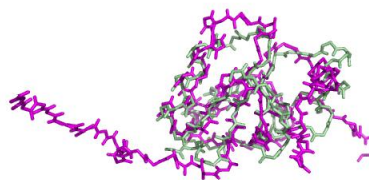

**Td BRCT domain**  
 PDB ID: 2COE  
 Sequence identity: 21 %  
 RMSD: 2.9 Å  
 C $\alpha$  atoms aligned: 84

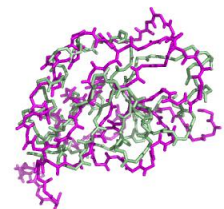

**Rap1 BRCT domain**  
 PDB ID: 2L42  
 Sequence identity: 24 %  
 RMSD: 3.0 Å  
 C $\alpha$  atoms aligned: 59

**Table S1. UV survival of yeast strains <sup>a</sup>**

| UV Dose<br>(J/M <sup>2</sup> ) | 0   | 50      | 100     | 150    | 200    |
|--------------------------------|-----|---------|---------|--------|--------|
| Wild-type                      | 100 | 91 ± 6  | 66 ± 9  | 44 ± 3 | 25 ± 1 |
| Vector                         | 100 | 56 ± 5  | 37 ± 3  | 15 ± 1 | 8 ± 1  |
| N174A                          | 100 | 88 ± 8  | 58 ± 7  | 43 ± 4 | 17 ± 3 |
| R181A                          | 100 | 78 ± 1  | 46 ± 2  | 35 ± 6 | 18 ± 2 |
| K217A                          | 100 | 84 ± 8  | 50 ± 5  | 37 ± 6 | 9 ± 1  |
| R181A,K217A                    | 100 | 87 ± 12 | 56 ± 17 | 34 ± 9 | 22 ± 6 |
| L182A                          | 100 | 79 ± 9  | 50 ± 10 | 30 ± 6 | 12 ± 4 |
| E186A                          | 100 | 77 ± 7  | 45 ± 14 | 27 ± 4 | 14 ± 4 |
| L190A                          | 100 | 73 ± 2  | 52 ± 8  | 23 ± 4 | 17 ± 2 |
| K194A                          | 100 | 83 ± 8  | 45 ± 7  | 23 ± 4 | 11 ± 4 |
| F195A                          | 100 | 85 ± 5  | 47 ± 5  | 32 ± 6 | 14 ± 7 |
| G193V                          | 100 | 42 ± 1  | 33 ± 7  | 20 ± 1 | 4 ± 2  |
| G193D                          | 100 | 43 ± 2  | 26 ± 3  | 15 ± 3 | 4 ± 1  |
| G193R                          | 100 | 51 ± 6  | 36 ± 9  | 22 ± 5 | 10 ± 4 |
| W231A                          | 100 | 49 ± 8  | 91 ± 5  | 27 ± 1 | 17 ± 4 |

<sup>a</sup> Data are the average of at least 4 independent data sets, standard deviations are reported.

**Table S2. UV mutagenesis of yeast strains <sup>a</sup>**

| UV Dose<br>(J/M <sup>2</sup> ) | 0 | 50         | 100         | 150         | 200         |
|--------------------------------|---|------------|-------------|-------------|-------------|
| Wild-type                      | - | 1000 ± 400 | 2200 ± 1000 | 2600 ± 800  | 4100 ± 700  |
| Vector                         | - | 26 ± 20    | 78 ± 8      | 150 ± 100   | 320 ± 100   |
| N174A                          | - | 1100 ± 600 | 1900 ± 800  | 2200 ± 1000 | 4400 ± 2000 |
| R181A                          | - | 1200 ± 500 | 2400 ± 1000 | 3800 ± 1500 | 2900 ± 1800 |
| K217A                          | - | 1000 ± 600 | 2000 ± 700  | 3100 ± 1500 | 2900 ± 1800 |
| R181A,K217A                    | - | 1200 ± 700 | 2000 ± 600  | 2500 ± 500  | 4100 ± 200  |
| L182A                          | - | 1200 ± 400 | 3000 ± 800  | 3900 ± 400  | 3700 ± 500  |
| E186A                          | - | 1300 ± 400 | 3000 ± 800  | 3500 ± 100  | 2800 ± 1000 |
| L190A                          | - | 1200 ± 600 | 2100 ± 1000 | 3200 ± 1700 | 4500 ± 1500 |
| K194A                          | - | 1100 ± 200 | 2900 ± 700  | 3800 ± 100  | 4500 ± 1000 |
| F195A                          | - | 1200 ± 700 | 1900 ± 800  | 2600 ± 700  | 2800 ± 1500 |
| G193V                          | - | 200 ± 120  | 300 ± 120   | 520 ± 230   | 950 ± 800   |
| G193D                          | - | 140 ± 110  | 190 ± 90    | 320 ± 210   | 720 ± 500   |
| G193R                          | - | 160 ± 70   | 280 ± 80    | 590 ± 220   | 940 ± 270   |
| W231A                          | - | 180 ± 40   | 360 ± 90    | 520 ± 170   | 1200 ± 700  |

<sup>a</sup> Data are the average of at least 4 independent data sets, standard deviations are reported.
